# Supplementary material for: Combination of Transcriptomic, Proteomic, and Metabolomic Analysis Reveals the Ripening Mechanism of Banana Pulp
Source: PubMed Central journal article supplement (PMC6843284; doi:10.3390/biom9100523), 2019-09-23
Supplement: biomolecules-09-00523-s001.pdf [file biomolecules-09-00523-s001.pdf]

# Combination of Transcriptomic, Proteomic, and Metabolomic Analysis Reveals the Ripening Mechanism of Banana Pulp

Taotao Li <sup>1,†</sup>, Ze Yun <sup>1,†</sup>, Qixian Wu <sup>1,2</sup>, Hongxia Qu <sup>1</sup>, Xuewu Duan <sup>1,\*</sup>, and Yueming Jiang <sup>1</sup>

<sup>1</sup> Key Laboratory of Post-Harvest Handling of Fruits, Ministry of Agriculture/Guangdong Provincial Key Laboratory of Applied Botany/Key Laboratory of Plant Resources Conservation and Sustainable Utilization, Guangzhou 510650

<sup>2</sup> University of Chinese Academy of Sciences, Beijing 100039, P.R. China

† These authors contributed equally to this work

\* Correspondence: xwduan@scbg.ac.cn

**Table S1.** Specific primers used in qRT-PCR.

| Gene ID*               | Gene name                                                 | Primer sequences (5'-3')                                               | Product length (bp) |
|------------------------|-----------------------------------------------------------|------------------------------------------------------------------------|---------------------|
| GSMUA_Achr11T22960_001 | <i>Expansin-A8</i>                                        | For: TACGGCATCAAGAACACGGCACTGAG<br>Rev: AGTAGTTGGTGGCGGTGACGGTGAT      | 145                 |
| GSMUA_Achr11T25010_001 | <i>glycosyl transferase, family 8</i>                     | For: TCTTGATGTTAATGCGAGTGACCTGTCCAA<br>Rev: GTGCCCTTCCCTGCTACAACCAACT  | 102                 |
| GSMUA_Achr5T15890_001  | <i>auxin efflux carrier component</i>                     | For: CATTCTCGGTGGCAATCTAACAGAAGGACT<br>Rev: CAATACAGCGGAGATCGTGCCAGGAA | 165                 |
| GSMUA_Achr11T05430_001 | <i>Pectinesterase 3</i>                                   | For: GGAAGAGCCAGACGAACCTGATGTT<br>Rev: AGGAAGCCATTGCCGACGATAGC         | 133                 |
| GSMUA_Achr3T10540_001  | <i>Putative Cytochrome P450</i>                           | For: TGTGCTTGCCAACCTCTCTACTCTCT<br>Rev: GCTTCCTCCATGCTGATGTCCTCTCTC    | 81                  |
| GSMUA_Achr10T12920_001 | <i>Trans-cinnamate 4-monoxygenase</i>                     | For: GCATGGACGACCCGCTCTTCAACA<br>Rev: CCATCTTCTTCTTCTCTCCGCCACGAA      | 207                 |
| GSMUA_Achr6T32320_001  | <i>NAC domain-containing protein</i>                      | For: CATCATCGCCGAGGTGGACATCTACAAG<br>Rev: ACCAACGCCTTCTTCACTCCGATATGC  | 228                 |
| GSMUA_Achr6T28260_001  | <i>Probable pectate lyase</i>                             | For: GCAGGTCACCATAGCCTTCAACCACTT<br>Rev: AGTTCCTTCTTCCACTCGCTCTCTCT    | 245                 |
| GSMUA_Achr8T12920_001  | <i>Probable aquaporin TIP1-1</i>                          | For: GATCTACTGGCTCGGTCCGCTCAT<br>Rev: TCGTGGGAGTGGCTGATGAAGAAGAA       | 81                  |
| GSMUA_Achr5T07470_001  | <i>Expansin-A2</i>                                        | For: TGTGTGAAGAAGGGAGGCGTAAGGT<br>Rev: CAGGTACGAGTTGCTCTGCCAGTTC       | 180                 |
| GSMUA_Achr5T20330_001  | <i>Peroxidase 5</i>                                       | For: GCATCTTGAAGCACCGTGGTCTGT<br>Rev: AGAGTTGGTCGCCAGCAGAGTCA          | 95                  |
| GSMUA_Achr6T33120_001  | <i>L-ascorbate peroxidase, cytosolic</i>                  | For: CGATAAGGCTCTCTCACCCGATCC<br>Rev: CAGCATAGTCAGCAAAGAAGGCATCC       | 89                  |
| GSMUA_Achr4T17840_001  | <i>Beta-amylase 3</i>                                     | For: CCGACGACAGCATTGACCTGAGTG<br>Rev: GGCACAACCTTCTTCCACCTTCC          | 130                 |
| GSMUA_Achr5T21880_001  | <i>Probable xyloglucan endotransglucosylase/hydrolase</i> | For: CCTTCCCAACAGCCAGCCCAT<br>Rev: AAGCACACTCGGAGGTAGCAGAC             | 174                 |
| GSMUA_Achr11T12650_001 | <i>Putative Ethylene-responsive transcription factor</i>  | For: AGCTCAACTCCCAGGAGTCGGTAGA<br>Rev: TCCGCCAGCTCCAACCATCTT           | 208                 |
| GSMUA_Achr4T31990_001  | <i>Auxin-responsive family protein</i>                    | For: GCCACCGATTGAAGCCGTCTAC<br>Rev: ACCTCGAACCGCTCCATCTCTCT            | 208                 |
| GSMUA_Achr7T26370_001  | <i>Probable indole-3-acetic acid-amido synthetase</i>     | For: ATCCTCTCCGCCATCCCATCTCT<br>Rev: GGCTCTGGAAGTGCTCGCTCTTGTA         | 271                 |
| GSMUA_Achr4T29150_001  | <i>1-aminocyclopropane-1-carboxylate synthase</i>         | For: TCACATCGCCTACAGCCTCTCCAAG<br>Rev: AACTCGTGGTGAACCTCTCGTCTCC       | 182                 |
| GSMUA_Achr3T20240_001  | <i>Actin1</i>                                             | For: TGGTATGGAAGCCGCTGGTA<br>Rev: TCTGCTGGAATGTGCTGAGG                 | 236                 |

\* The ID was obtained from *Banana* genome in <http://banana-genome.cirad.fr/home>.

**Table 2.** Some differentially expressed genes mentioned in this paper. #N/A: Not significantly differentially expressed.

| GeneID                        | log2(F2/F1) | log2(F3/F1) | log2(F4/F1) | Description                                              |
|-------------------------------|-------------|-------------|-------------|----------------------------------------------------------|
| <i>Sugar metabolism</i>       |             |             |             |                                                          |
| GSMUA_Achr5T28150_001         | #N/A        | #N/A        | 11.889323   | Hypothetical protein                                     |
| GSMUA_Achr9T16670_001         | #N/A        | #N/A        | 11.158097   | Polygalacturonase                                        |
| GSMUA_Achr4T20850_001         | #N/A        | #N/A        | 11.153666   | Putative Phosphoenolpyruvate carboxykinase [ATP]         |
| GSMUA_Achr5T28160_001         | #N/A        | #N/A        | 10.948538   | Hypothetical protein                                     |
| GSMUA_Achr4T28890_001         | #N/A        | #N/A        | 5.7833021   | Pyruvate kinase isozyme G                                |
| GSMUA_Achr2T14330_001         | #N/A        | 11.274208   | #N/A        | Putative Polygalacturonase At1g48100                     |
| GSMUA_AchrUn_randomT27170_001 | #N/A        | 11.009196   | #N/A        | Sugar transport protein 13                               |
| GSMUA_Achr1T00870_001         | #N/A        | 10.9725     | 10.57192    | Putative 21 kDa protein                                  |
| GSMUA_Achr7T15620_001         | #N/A        | 8.0811427   | 7.5249613   | Pectinesterase/pectinesterase inhibitor PPE8B            |
| GSMUA_Achr11T09430_001        | #N/A        | 6.910651    | #N/A        | Probable NAD(P)H-dependent oxidoreductase 1              |
| GSMUA_Achr6T05900_001         | #N/A        | 5.8032888   | 6.8782159   | Putative 21 kDa protein                                  |
| GSMUA_Achr5T28140_001         | #N/A        | 5.5809782   | 10.329613   | Pyruvate decarboxylase isozyme 2                         |
| GSMUA_Achr7T18470_001         | #N/A        | 5.3413789   | #N/A        | Probable galacturonosyltransferase-like 9                |
| GSMUA_Achr7T26570_001         | #N/A        | 5.2180913   | 4.933326    | Hypothetical protein                                     |
| GSMUA_Achr4T16250_001         | #N/A        | 5.1970539   | #N/A        | Fructokinase-1                                           |
| GSMUA_Achr1T23960_001         | #N/A        | 5.1577286   | #N/A        | Cellulose synthase-like protein D2                       |
| GSMUA_Achr3T05750_001         | #N/A        | 5.089126    | #N/A        | pectinesterase/pectinesterase inhibitor 12               |
| GSMUA_Achr7T16250_001         | #N/A        | 4.9752569   | #N/A        | UDP-glucuronate 4-epimerase 1                            |
| GSMUA_Achr6T11090_001         | #N/A        | 4.9556703   | #N/A        | UDP-glucose 6-dehydrogenase                              |
| GSMUA_Achr3T03290_001         | #N/A        | 4.862395    | 5.3423045   | Soluble starch synthase 1                                |
| GSMUA_Achr5T07390_001         | #N/A        | 4.3722631   | #N/A        | Pyruvate decarboxylase isozyme 2                         |
| GSMUA_Achr3T10110_001         | #N/A        | 4.3272963   | #N/A        | Pyruvate decarboxylase isozyme 2                         |
| GSMUA_Achr10T18280_001        | #N/A        | 4.0475892   | #N/A        | UDP-glucose 6-dehydrogenase                              |
| GSMUA_Achr7T11480_001         | #N/A        | 3.7920904   | #N/A        | Pectinesterase 3                                         |
| GSMUA_Achr8T04140_001         | #N/A        | 3.6697306   | #N/A        | Alpha-amylase                                            |
| GSMUA_Achr7T26580_001         | #N/A        | 3.3392906   | #N/A        | UDP-glucose 6-dehydrogenase                              |
| GSMUA_Achr6T27190_001         | #N/A        | -4.174692   | #N/A        | Glucose-1-phosphate adenylyltransferase large subunit 2, |
| GSMUA_Achr3T23340_001         | #N/A        | -4.270252   | #N/A        | Probable alpha-glucosidase                               |
| GSMUA_Achr3T29530_001         | #N/A        | -5.034086   | #N/A        | Beta-glucosidase 1                                       |
| GSMUA_Achr3T23330_001         | #N/A        | -5.447644   | #N/A        | Hypothetical protein                                     |
| GSMUA_Achr10T00650_001        | 8.0489263   | #N/A        | #N/A        | Fructose-1,6-bisphosphatase                              |
| GSMUA_Achr6T17900_001         | 7.8202119   | #N/A        | 5.537678    | Fructose-bisphosphate aldolase                           |
| GSMUA_Achr8T11740_001         | 6.1151529   | 7.4362729   | 6.9971128   | Aldehyde dehydrogenase family 3 member F1                |
| GSMUA_Achr8T17280_001         | 5.4310798   | #N/A        | #N/A        | Fructose-bisphosphate aldolase                           |
| GSMUA_Achr7T19810_001         | 4.9188828   | #N/A        | #N/A        | Sucrose synthase 1                                       |
| GSMUA_Achr5T08790_001         | 4.8843495   | #N/A        | #N/A        | Putative Lysosomal beta glucosidase                      |
| GSMUA_Achr4T14320_001         | 4.1942108   | 5.0695261   | #N/A        | UDP-glucose 6-dehydrogenase                              |
| GSMUA_Achr4T17840_001         | 3.2512846   | 4.7044814   | 4.8279554   | Beta-amylase 3                                           |
| GSMUA_Achr8T18810_001         | -3.189724   | -4.678706   | #N/A        | Phosphoenolpyruvate carboxykinase [ATP]                  |
| GSMUA_Achr8T08790_001         | -3.400789   | -5.865745   | #N/A        | UDP-glucuronate 4-epimerase 6                            |
| GSMUA_Achr11T05430_001        | -3.835821   | -5.706748   | -5.044671   | Pectinesterase 3                                         |
| GSMUA_Achr11T25010_001        | -4.150236   | -6.983959   | -4.829516   | glycosyl transferase, family 8, putative                 |
| GSMUA_Achr5T28150_001         | #N/A        | #N/A        | 11.889323   | Hypothetical protein                                     |
| GSMUA_Achr9T16670_001         | #N/A        | #N/A        | 11.158097   | Polygalacturonase                                        |
| GSMUA_Achr4T20850_001         | #N/A        | #N/A        | 11.153666   | Putative Phosphoenolpyruvate carboxykinase [ATP]         |
| GSMUA_Achr5T28160_001         | #N/A        | #N/A        | 10.948538   | Hypothetical protein                                     |
| GSMUA_Achr4T28890_001         | #N/A        | #N/A        | 5.7833021   | Pyruvate kinase isozyme G                                |
| GSMUA_Achr2T14330_001         | #N/A        | 11.274208   | #N/A        | Putative Polygalacturonase                               |
| GSMUA_AchrUn_randomT27170_001 | #N/A        | 11.009196   | #N/A        | Sugar transport protein 13                               |
| GSMUA_Achr1T00870_001         | #N/A        | 10.9725     | 10.57192    | Putative 21 kDa protein                                  |
| GSMUA_Achr7T15620_001         | #N/A        | 8.0811427   | 7.5249613   | Pectinesterase/pectinesterase inhibitor PPE8B            |
| GSMUA_Achr11T09430_001        | #N/A        | 6.910651    | #N/A        | Probable NAD(P)H-dependent oxidoreductase 1              |
| GSMUA_Achr6T05900_001         | #N/A        | 5.8032888   | 6.8782159   | Putative 21 kDa protein                                  |
| GSMUA_Achr5T28140_001         | #N/A        | 5.5809782   | 10.329613   | Pyruvate decarboxylase isozyme 2                         |
| GSMUA_Achr7T18470_001         | #N/A        | 5.3413789   | #N/A        | Probable galacturonosyltransferase-like 9                |
| GSMUA_Achr7T26570_001         | #N/A        | 5.2180913   | 4.933326    | Hypothetical protein                                     |
| GSMUA_Achr4T16250_001         | #N/A        | 5.1970539   | #N/A        | Fructokinase-1                                           |
| GSMUA_Achr1T23960_001         | #N/A        | 5.1577286   | #N/A        | Cellulose synthase-like protein D2                       |
| GSMUA_Achr3T05750_001         | #N/A        | 5.089126    | #N/A        | pectinesterase/pectinesterase inhibitor 12               |
| GSMUA_Achr7T16250_001         | #N/A        | 4.9752569   | #N/A        | UDP-glucuronate 4-epimerase 1                            |
| GSMUA_Achr6T11090_001         | #N/A        | 4.9556703   | #N/A        | UDP-glucose 6-dehydrogenase                              |
| GSMUA_Achr3T03290_001         | #N/A        | 4.862395    | 5.3423045   | Soluble starch synthase 1, chloroplastic/amyloplastic    |
| GSMUA_Achr5T07390_001         | #N/A        | 4.3722631   | #N/A        | Pyruvate decarboxylase isozyme 2                         |
| GSMUA_Achr3T10110_001         | #N/A        | 4.3272963   | #N/A        | Pyruvate decarboxylase isozyme 2                         |
| GSMUA_Achr10T18280_001        | #N/A        | 4.0475892   | #N/A        | UDP-glucose 6-dehydrogenase                              |
| GSMUA_Achr7T11480_001         | #N/A        | 3.7920904   | #N/A        | Pectinesterase 3                                         |
| GSMUA_Achr8T04140_001         | #N/A        | 3.6697306   | #N/A        | Alpha-amylase                                            |
| GSMUA_Achr7T26580_001         | #N/A        | 3.3392906   | #N/A        | UDP-glucose 6-dehydrogenase                              |

|                        |           |           |           |                                                         |
|------------------------|-----------|-----------|-----------|---------------------------------------------------------|
| GSMUA_Achr6T27190_001  | #N/A      | -4.174692 | #N/A      | Glucose-1-phosphate adenylyltransferase large subunit 2 |
| GSMUA_Achr3T23340_001  | #N/A      | -4.270252 | #N/A      | Probable alpha-glucosidase                              |
| GSMUA_Achr3T29530_001  | #N/A      | -5.034086 | #N/A      | Beta-glucosidase 1                                      |
| GSMUA_Achr3T23330_001  | #N/A      | -5.447644 | #N/A      | Hypothetical protein                                    |
| GSMUA_Achr10T00650_001 | 8.0489263 | #N/A      | #N/A      | Fructose-1,6-bisphosphatase                             |
| GSMUA_Achr6T17900_001  | 7.8202119 | #N/A      | 5.537678  | Fructose-bisphosphate aldolase                          |
| GSMUA_Achr8T11740_001  | 6.1151529 | 7.4362729 | 6.9971128 | Aldehyde dehydrogenase family 3 member F1               |
| GSMUA_Achr8T17280_001  | 5.4310798 | #N/A      | #N/A      | Fructose-bisphosphate aldolase                          |
| GSMUA_Achr7T19810_001  | 4.9188828 | #N/A      | #N/A      | Sucrose synthase 1                                      |
| GSMUA_Achr5T08790_001  | 4.8843495 | #N/A      | #N/A      | Putative Lysosomal beta glucosidase                     |
| GSMUA_Achr4T14320_001  | 4.1942108 | 5.0695261 | #N/A      | UDP-glucose 6-dehydrogenase                             |
| GSMUA_Achr4T17840_001  | 3.2512846 | 4.7044814 | 4.8279554 | Beta-amylase 3, chloroplast                             |
| GSMUA_Achr8T18810_001  | -3.189724 | -4.678706 | #N/A      | Phosphoenolpyruvate carboxykinase [ATP]                 |
| GSMUA_Achr8T08790_001  | -3.400789 | -5.865745 | #N/A      | UDP-glucuronate 4-epimerase 6                           |
| GSMUA_Achr11T05430_001 | -3.835821 | -5.706748 | -5.044671 | Pectinesterase 3                                        |
| GSMUA_Achr11T25010_001 | -4.150236 | -6.983959 | -4.829516 | glycosyl transferase, family 8                          |

**secondary metabolism related genes**

|                               |           |           |           |                                                                                                                   |
|-------------------------------|-----------|-----------|-----------|-------------------------------------------------------------------------------------------------------------------|
| GSMUA_Achr7T20440_001         | 3.8334438 | #N/A      | #N/A      | Serine--glyoxylate aminotransferase                                                                               |
| GSMUA_Achr10T18000_001        | 7.398088  | #N/A      | #N/A      | 3-ketoacyl-CoA synthase 6                                                                                         |
| GSMUA_Achr7T19200_001         | 8.2319678 | #N/A      | #N/A      | Putative (+)-delta-cadinene synthase isozyme A                                                                    |
| GSMUA_Achr6T17900_001         | 7.8202119 | #N/A      | 5.537678  | Fructose-bisphosphate aldolase                                                                                    |
| GSMUA_Achr3T02180_001         | 10.438443 | #N/A      | #N/A      | 3-ketoacyl-CoA synthase 6                                                                                         |
| GSMUA_Achr8T10230_001         | 3.8635322 | #N/A      | #N/A      | UDP-glucuronic acid decarboxylase 1                                                                               |
| GSMUA_AchrUn_randomT27450_001 | 6.8909264 | #N/A      | #N/A      | Putative (+)-delta-cadinene synthase isozyme A                                                                    |
| GSMUA_Achr9T00170_001         | 4.1574005 | 5.7016985 | 4.8250595 | UDP-glucose 4-epimerase GEPI48                                                                                    |
| GSMUA_Achr6T30280_001         | 8.2122544 | #N/A      | #N/A      | Putative Acidic mammalian chitinase                                                                               |
| GSMUA_Achr5T08790_001         | 4.8843495 | #N/A      | #N/A      | Putative Lysosomal beta glucosidase                                                                               |
| GSMUA_Achr2T06930_001         | 3.2766542 | #N/A      | #N/A      | Putative Haloacid dehalogenase-like hydrolase domain-containing protein 3                                         |
| GSMUA_Achr2T14310_001         | 4.7772217 | 6.1834683 | #N/A      | Chalcone synthase E                                                                                               |
| GSMUA_AchrUn_randomT13750_001 | 11.183816 | #N/A      | #N/A      | Putative (+)-delta-cadinene synthase                                                                              |
| GSMUA_Achr9T29540_001         | 6.3137197 | #N/A      | #N/A      | Putative Peroxidase 12                                                                                            |
| GSMUA_Achr7T19220_001         | 11.239928 | #N/A      | #N/A      | Putative (+)-delta-cadinene synthase isozyme A                                                                    |
| GSMUA_AchrUn_randomT23970_001 | 6.7205808 | 9.838444  | 11.633266 | Cytochrome P450-1                                                                                                 |
| GSMUA_Achr7T11330_001         | 11.059776 | #N/A      | #N/A      | Peroxidase 15                                                                                                     |
| GSMUA_Achr10T12080_001        | 3.8571695 | 6.2178166 | #N/A      | Obtusifoliol 14-alpha demethylase                                                                                 |
| GSMUA_AchrUn_randomT20470_001 | 8.0270864 | #N/A      | #N/A      | Putative (+)-delta-cadinene synthase isozyme A                                                                    |
| GSMUA_Achr3T17110_001         | 10.235707 | #N/A      | #N/A      | Putative Estradiol 17-beta-dehydrogenase 12                                                                       |
| GSMUA_AchrUn_randomT25250_001 | 5.0107717 | 5.0249177 | #N/A      | Putative Polynneuridine-aldehyde esterase                                                                         |
| GSMUA_Achr7T19230_001         | 7.1461341 | #N/A      | #N/A      | Putative Germacrene-D synthase                                                                                    |
| GSMUA_Achr8T17280_001         | 5.4310798 | #N/A      | #N/A      | Fructose-bisphosphate aldolase                                                                                    |
| GSMUA_Achr4T31780_001         | 10.572519 | #N/A      | #N/A      | Uncharacterized oxidoreductase                                                                                    |
| GSMUA_Achr7T07880_001         | 6.6074744 | 4.3293196 | #N/A      | Probable peroxisomal (S)-2-hydroxy-acid oxidase 2                                                                 |
| GSMUA_Achr5T20330_001         | 4.9459265 | 4.6176329 | #N/A      | Peroxidase 5                                                                                                      |
| GSMUA_Achr1T06310_001         | 12.19999  | #N/A      | 10.86604  | Glycine cleavage system H protein                                                                                 |
| GSMUA_AchrUn_randomT18440_001 | 12.116833 | #N/A      | #N/A      | Putative Germacrene A synthase long form                                                                          |
| GSMUA_Achr11T15080_001        | 4.7505775 | #N/A      | #N/A      | BTBZ2 - Bric-a-Brac, Tramtrack, and Broad Complex BTB domain with TAZ zinc finger and Calmodulin-binding domains, |
| GSMUA_Achr6T14620_001         | 3.5061891 | 5.4906648 | #N/A      | Putative Peroxidase 52                                                                                            |
| GSMUA_Achr9T13520_001         | 10.167764 | 8.9080272 | #N/A      | Protein WAX2                                                                                                      |
| GSMUA_Achr6T21330_001         | 8.7710123 | #N/A      | #N/A      | Endochitinase PR4                                                                                                 |
| GSMUA_AchrUn_randomT13780_001 | 12.731886 | #N/A      | #N/A      | Hypothetical protein                                                                                              |
| GSMUA_Achr7T19240_001         | 10.650366 | #N/A      | #N/A      | Putative (+)-delta-cadinene synthase isozyme A                                                                    |
| GSMUA_Achr3T02010_001         | 7.513584  | 6.9412215 | 6.7881713 | 3-ketoacyl-CoA synthase 10                                                                                        |
| GSMUA_Achr7T19260_001         | 5.9339962 | #N/A      | #N/A      | Vetispiradiene synthase 1                                                                                         |
| GSMUA_Achr10T00650_001        | 8.0489263 | #N/A      | #N/A      | Fructose-1,6-bisphosphatase                                                                                       |
| GSMUA_Achr11T11790_001        | 5.6182033 | 7.3003911 | 7.6773237 | Polynneuridine-aldehyde esterase                                                                                  |
| GSMUA_Achr1T04740_001         | 12.173085 | #N/A      | 10.706987 | 3-ketoacyl-CoA synthase 17                                                                                        |
| GSMUA_Achr8T18810_001         | -3.189724 | -4.678706 | #N/A      | Phosphoenolpyruvate carboxykinase [ATP]                                                                           |
| GSMUA_Achr5T11300_001         | 6.8071781 | #N/A      | #N/A      | 3-ketoacyl-CoA synthase 1                                                                                         |
| GSMUA_Achr11T23450_001        | 3.4573578 | 4.255342  | #N/A      | Probable 4-coumarate--CoA ligase 2                                                                                |
| GSMUA_Achr4T29150_001         | 10.093263 | 11.255807 | 8.0855062 | 1-aminocyclopropane-1-carboxylate synthase                                                                        |
| GSMUA_Achr7T19250_001         | 7.9395639 | #N/A      | #N/A      | Putative (+)-delta-cadinene synthase isozyme A                                                                    |
| GSMUA_Achr2T11090_001         | 6.2803898 | #N/A      | #N/A      | Putative GDSL esterase/lipase                                                                                     |
| GSMUA_Achr4T07810_001         | 11.639771 | #N/A      | #N/A      | hydrolase, alpha/beta fold family domain containing protein                                                       |
| GSMUA_Achr3T10540_001         | 10.418868 | 13.557513 | 15.268244 | Putative Cytochrome P450 71A9                                                                                     |

|                               |           |           |           |                                                                      |
|-------------------------------|-----------|-----------|-----------|----------------------------------------------------------------------|
| GSMUA_Achr7T19190_001         | 6.1307757 | #N/A      | #N/A      | Putative (+)-delta-cadinene synthase isozyme XC14                    |
| GSMUA_Achr10T4730_001         | 11.951515 | #N/A      | #N/A      | Putative 3-ketoacyl-CoA synthase 11                                  |
| GSMUA_Achr11T25010_001        | -4.150236 | -6.983959 | -4.829516 | glycosyl transferase, family 8                                       |
| GSMUA_Achr5T03490_001         | 12.838817 | 11.408783 | 12.709871 | Putative Dihydroflavonol-4-reductase                                 |
| GSMUA_Achr3T25050_001         | 4.6789856 | #N/A      | #N/A      | Magnesium-protoporphyrin IX monomethyl ester [oxidative] cyclase     |
| GSMUA_Achr2T03950_001         | 6.1677994 | 8.8235155 | 9.4857735 | Putative peroxisomal-coenzyme A synthetase                           |
| GSMUA_Achr11T24060_001        | 10.089986 | 10.264349 | #N/A      | Tropinone reductase homolog                                          |
| GSMUA_AchrUn_randomT13720_001 | 5.7119211 | #N/A      | #N/A      | Putative (+)-delta-cadinene synthase                                 |
| GSMUA_Achr3T07030_001         | 11.027406 | #N/A      | #N/A      | Flavonol synthase/flavanone 3-hydroxylase                            |
| GSMUA_AchrUn_randomT27430_001 | 9.5325856 | #N/A      | #N/A      | Putative Casbene synthase, chloroplastic                             |
| GSMUA_Achr11T01900_001        | 7.0650247 | #N/A      | #N/A      | Protochlorophyllide reductase B                                      |
| GSMUA_Achr5T11310_001         | 11.097794 | #N/A      | #N/A      | Putative 3-ketoacyl-CoA synthase 1                                   |
| GSMUA_Achr10T00370_001        | 4.2126663 | #N/A      | #N/A      | Magnesium-protoporphyrin IX monomethyl ester [oxidative] cyclase     |
| GSMUA_Achr6T00040_001         | 6.00509   | #N/A      | #N/A      | Cytochrome P450 85A1                                                 |
| GSMUA_Achr10T12920_001        | 3.4141129 | 5.1445819 | 4.7591894 | Trans-cinnamate 4-monooxygenase                                      |
| GSMUA_Achr4T14320_001         | 4.1942108 | 5.0695261 | #N/A      | UDP-glucose 6-dehydrogenase                                          |
| GSMUA_Achr2T21590_001         | 8.3669377 | 7.3656625 | 7.8035685 | 3-ketoacyl-CoA synthase 6                                            |
| GSMUA_Achr8T11740_001         | 6.1151529 | 7.4362729 | 6.9971128 | Aldehyde dehydrogenase family 3 member F1                            |
| GSMUA_Achr6T00870_001         | #N/A      | 7.0767727 | #N/A      | 1-aminocyclopropane-1-carboxylate oxidase                            |
| GSMUA_AchrUn_randomT25240_001 | #N/A      | 3.9302259 | #N/A      | Polyneuridine-aldehyde esterase                                      |
| GSMUA_AchrUn_randomT23850_001 | #N/A      | 12.089683 | 12.983799 | Hypothetical protein                                                 |
| GSMUA_Achr5T09690_001         | #N/A      | 10.406254 | #N/A      | Putative 1-aminocyclopropane-1-carboxylate oxidase                   |
| GSMUA_Achr8T19570_001         | #N/A      | 13.468699 | #N/A      | Putative BAHD acyltransferase DCR                                    |
| GSMUA_Achr5T03950_001         | #N/A      | 10.416196 | #N/A      | Phenylalanine ammonia-lyase 1                                        |
| GSMUA_Achr11T21810_001        | #N/A      | 3.7874857 | 4.6638635 | Cytochrome P450 84A1                                                 |
| GSMUA_Achr11T05530_001        | #N/A      | 4.7792368 | 4.9464821 | NAD dependent epimerase/dehydratase family domain containing protein |
| GSMUA_Achr4T10640_001         | #N/A      | 10.591419 | #N/A      | Dihydroflavonol-4-reductase                                          |
| GSMUA_Achr5T07390_001         | #N/A      | 4.3722631 | #N/A      | Pyruvate decarboxylase isozyme 2                                     |
| GSMUA_Achr6T36400_001         | #N/A      | 3.7657075 | #N/A      | Caffeoyl-CoA O-methyltransferase                                     |
| GSMUA_AchrUn_randomT08000_001 | #N/A      | 13.610396 | #N/A      | Putative Uncharacterized acetyltransferase                           |
| GSMUA_Achr5T28200_001         | #N/A      | -7.599928 | #N/A      | Asparagine synthetase [glutamine-hydrolyzing]                        |
| GSMUA_Achr7T27090_001         | #N/A      | 3.3091626 | #N/A      | Cycloartenol-C-24-methyltransferase 1                                |
| GSMUA_Achr11T26490_001        | #N/A      | -4.516669 | #N/A      | Putative Cytochrome P450 71D7                                        |
| GSMUA_Achr3T29530_001         | #N/A      | -5.034086 | #N/A      | Beta-glucosidase 1                                                   |
| GSMUA_Achr7T08410_001         | #N/A      | 3.7353437 | #N/A      | 3-ketoacyl-CoA synthase 11                                           |
| GSMUA_AchrUn_randomT26960_001 | #N/A      | 7.8808379 | #N/A      | 1-aminocyclopropane-1-carboxylate oxidase                            |
| GSMUA_Achr3T10110_001         | #N/A      | 4.3272963 | #N/A      | Pyruvate decarboxylase isozyme 2                                     |
| GSMUA_Achr5T04550_001         | #N/A      | 3.6853446 | #N/A      | Putative Anthranilate N-benzoyltransferase protein 1                 |
| GSMUA_AchrUn_randomT28250_001 | #N/A      | 7.1334032 | 8.4150617 | Cytochrome P450 71A1                                                 |
| GSMUA_Achr4T25540_001         | #N/A      | 8.1334495 | 7.4185955 | 24-methylenesterol C-methyltransferase 2                             |
| GSMUA_Achr5T08490_001         | #N/A      | 10.837769 | 11.173753 | Putative Protein SRG1                                                |
| GSMUA_Achr5T28140_001         | #N/A      | 5.5809782 | 10.329613 | Pyruvate decarboxylase isozyme 2                                     |
| GSMUA_Achr10T14220_001        | #N/A      | 15.324721 | 11.446926 | Peroxidase 4                                                         |
| GSMUA_Achr6T07190_001         | #N/A      | 11.741684 | 12.290913 | Putative 3-hydroxybenzoate 6-hydroxylase 1                           |
| GSMUA_Achr7T02130_001         | #N/A      | 10.487155 | #N/A      | S-adenosylmethionine synthase                                        |
| GSMUA_Achr1T21750_001         | #N/A      | 3.2042354 | #N/A      | cystathionine gamma-synthase                                         |
| GSMUA_Achr11T09320_001        | #N/A      | -3.468818 | #N/A      | Putative Adipocyte plasma membrane-associated protein                |
| GSMUA_Achr6T21530_001         | #N/A      | 6.1187807 | #N/A      | Peroxidase 52                                                        |
| GSMUA_Achr10T19150_001        | #N/A      | 4.780451  | #N/A      | Putative Cytokinin-O-glucosyltransferase 2                           |
| GSMUA_Achr9T21400_001         | #N/A      | 5.266843  | 5.4311627 | Hypothetical protein                                                 |
| GSMUA_Achr10T27850_001        | #N/A      | 5.7362091 | #N/A      | Peroxidase 52                                                        |
| GSMUA_Achr1T01400_001         | #N/A      | 3.6520491 | 5.3641495 | Putative O-methyltransferase ZRP4                                    |
| GSMUA_Achr9T10050_001         | #N/A      | -6.9825   | #N/A      | Phytoene synthase, chloroplastic                                     |
| GSMUA_Achr7T10870_001         | #N/A      | 3.4377689 | #N/A      | Probable chlorophyll(ide) b reductase NYC1                           |
| GSMUA_Achr9T27540_001         | #N/A      | -5.178889 | #N/A      | Shikimate kinase                                                     |
| GSMUA_Achr10T18280_001        | #N/A      | 4.0475892 | #N/A      | UDP-glucose 6-dehydrogenase                                          |
| GSMUA_Achr7T26570_001         | #N/A      | 5.2180913 | 4.933326  | Hypothetical protein                                                 |
| GSMUA_Achr5T04080_001         | #N/A      | 12.58443  | #N/A      | Leucoanthocyanidin dioxygenase                                       |
| GSMUA_AchrUn_randomT29200_001 | #N/A      | 9.9410335 | 10.335514 | Putative Cytokinin-O-glucosyltransferase 2                           |
| GSMUA_Achr7T26580_001         | #N/A      | 3.3392906 | #N/A      | UDP-glucose 6-dehydrogenase                                          |
| GSMUA_Achr10T30380_001        | #N/A      | -3.907197 | -5.555834 | Phospho-2-dehydro-3-deoxyheptonate aldolase 1                        |
| GSMUA_Achr11T09430_001        | #N/A      | 6.910651  | #N/A      | Probable NAD(P)H-dependent oxidoreductase 1                          |
| GSMUA_Achr7T18470_001         | #N/A      | 5.3413789 | #N/A      | Probable galacturonosyltransferase-like 9                            |
| GSMUA_Achr5T25040_001         | #N/A      | 11.006096 | #N/A      | Peroxidase 55                                                        |

|                                   |           |           |           |                                                       |
|-----------------------------------|-----------|-----------|-----------|-------------------------------------------------------|
| GSMUA_AchrUn_randomT27<br>170_001 | #N/A      | 11.009196 | #N/A      | Sugar transport protein 13                            |
| GSMUA_Achr10T12200_001            | #N/A      | 10.990642 | 10.287527 | Chalcone synthase                                     |
| GSMUA_Achr5T18560_001             | #N/A      | 3.5787827 | #N/A      | Phenylalanine ammonia-lyase 1                         |
| GSMUA_Achr6T11090_001             | #N/A      | 4.9556703 | #N/A      | UDP-glucose 6-dehydrogenase                           |
| GSMUA_Achr6T19880_001             | #N/A      | 3.2380853 | #N/A      | Probable peroxisomal (S)-2-hydroxy-acid oxidase 2     |
| GSMUA_Achr5T11010_001             | #N/A      | 11.137891 | 12.948054 | Putative Probable gibberellin receptor GID1L2         |
| GSMUA_Achr5T03950_001             | #N/A      | 10.416196 | #N/A      | Phenylalanine ammonia-lyase 1                         |
| GSMUA_Achr5T18560_001             | #N/A      | 3.5787827 | #N/A      | Phenylalanine ammonia-lyase 1                         |
| GSMUA_Achr2T22970_001             | #N/A      | #N/A      | 6.7241153 | Chalcone synthase                                     |
| GSMUA_AchrUn_randomT26<br>440_001 | #N/A      | #N/A      | 7.0905947 | Putative Protein SRG1                                 |
| GSMUA_Achr5T28150_001             | #N/A      | #N/A      | 11.889323 | Hypothetical protein                                  |
| GSMUA_Achr10T18200_001            | #N/A      | #N/A      | -6.714387 | Putative Isoflavone 2'-hydroxylase                    |
| GSMUA_Achr7T26390_001             | #N/A      | #N/A      | 11.248721 | Putative Isoflavone 2'-hydroxylase                    |
| GSMUA_Achr11T04490_001            | #N/A      | #N/A      | 11.23298  | Putative S-norcochloraurine synthase 1                |
| GSMUA_Achr2T11130_001             | #N/A      | #N/A      | 4.8173377 | Putative GDSL esterase/lipase                         |
| GSMUA_Achr4T28890_001             | #N/A      | #N/A      | 5.7833021 | Pyruvate kinase isozyme G, chloroplastic              |
| GSMUA_Achr4T20850_001             | #N/A      | #N/A      | 11.153666 | Putative Phosphoenolpyruvate carboxykinase [ATP]      |
| GSMUA_Achr5T04570_001             | #N/A      | #N/A      | 7.499047  | troponine reductase 2                                 |
| GSMUA_Achr5T29600_001             | #N/A      | #N/A      | 10.786115 | Peroxidase 4                                          |
| GSMUA_Achr5T17150_001             | #N/A      | #N/A      | 7.501847  | Hypothetical protein                                  |
| GSMUA_AchrUn_randomT16<br>580_001 | #N/A      | #N/A      | 10.467915 | Putative uncharacterized protein                      |
| GSMUA_Achr1T07320_001             | #N/A      | #N/A      | 10.563969 | Endochitinase                                         |
| GSMUA_Achr3T02950_001             | #N/A      | #N/A      | 6.6242307 | Peroxidase 12                                         |
| GSMUA_Achr2T11160_001             | #N/A      | #N/A      | 5.6005034 | Putative GDSL esterase/lipase                         |
| GSMUA_Achr5T28160_001             | #N/A      | #N/A      | 10.948538 | Hypothetical protein                                  |
| GSMUA_Achr3T16520_001             | #N/A      | #N/A      | 9.4485185 | Peroxidase 43                                         |
| GSMUA_Achr9T03440_001             | #N/A      | #N/A      | 7.2760967 | Tropinone reductase homolog                           |
| GSMUA_Achr9T00170_001             | 4.1574005 | 5.7016985 | 4.8250595 | UDP-glucose 4-epimerase GEPI48                        |
| GSMUA_AchrUn_randomT23<br>970_001 | 6.7205808 | 9.838444  | 11.633266 | Cytochrome P450-1                                     |
| GSMUA_Achr3T02010_001             | 7.513584  | 6.9412215 | 6.7881713 | 3-ketoacyl-CoA synthase 10                            |
| GSMUA_Achr11T11790_001            | 5.6182033 | 7.3003911 | 7.6773237 | Putative Polyneuridine-aldehyde esterase              |
| GSMUA_Achr4T29150_001             | 10.093263 | 11.255807 | 8.0855062 | 1-aminocyclopropane-1-carboxylate synthase            |
| GSMUA_Achr3T10540_001             | 10.418868 | 13.557513 | 15.268244 | Putative Cytochrome P450 71A9                         |
| GSMUA_Achr11T25010_001            | -4.150236 | -6.983959 | -4.829516 | glycosyl transferase, family 8, putative, expressed   |
| GSMUA_Achr5T03490_001             | 12.838817 | 11.408783 | 12.709871 | Putative Dihydroflavonol-4-reductase                  |
| GSMUA_Achr2T03950_001             | 6.1677994 | 8.8235155 | 9.4857735 | Putative peroxisomal-coenzyme A synthetase            |
| GSMUA_Achr10T12920_001            | 3.4141129 | 5.1445819 | 4.7591894 | Trans-cinnamate 4-monooxygenase                       |
| GSMUA_Achr2T21590_001             | 8.3669377 | 7.3656625 | 7.8035685 | 3-ketoacyl-CoA synthase 6                             |
| GSMUA_Achr8T11740_001             | 6.1151529 | 7.4362729 | 6.9971128 | Aldehyde dehydrogenase family 3 member F1             |
| <b>oxidation-reduction</b>        |           |           |           |                                                       |
| GSMUA_Achr7T26390_001             | #N/A      | #N/A      | 11.248721 | Putative Isoflavone 2'-hydroxylase                    |
| GSMUA_Achr5T29600_001             | #N/A      | #N/A      | 10.786115 | Peroxidase 4                                          |
| GSMUA_Achr6T01210_001             | #N/A      | #N/A      | 10.321576 | Acyl-[acyl-carrier-protein] desaturase, chloroplastic |
| GSMUA_Achr3T16520_001             | #N/A      | #N/A      | 9.4485185 | Peroxidase 43                                         |
| GSMUA_Achr5T14190_001             | #N/A      | #N/A      | 7.748746  | Omega-3 fatty acid desaturase                         |
| GSMUA_Achr9T03440_001             | #N/A      | #N/A      | 7.2760967 | Tropinone reductase homolog                           |
| GSMUA_Achr10T14220_001            | #N/A      | 15.324721 | 11.446926 | Peroxidase 4                                          |
| GSMUA_Achr4T15110_001             | #N/A      | 12.038279 | #N/A      | Gibberellin 2-beta-dioxygenase 1                      |
| GSMUA_Achr6T07190_001             | #N/A      | 11.741684 | 12.290913 | Putative 3-hydroxybenzoate 6-hydroxylase 1            |
| GSMUA_Achr5T25040_001             | #N/A      | 11.006096 | #N/A      | Peroxidase 55                                         |
| GSMUA_Achr6T04470_001             | #N/A      | 10.911212 | #N/A      | oxidoreductase, putative                              |
| GSMUA_Achr9T06460_001             | #N/A      | 10.473573 | #N/A      | Gibberellin 2-beta-dioxygenase                        |
| GSMUA_Achr6T35880_001             | #N/A      | 10.365646 | #N/A      | Putative 2-aminoethanethiol dioxygenase               |
| GSMUA_Achr8T20430_001             | #N/A      | 9.9992879 | 10.312818 | Short-chain type dehydrogenase/reductase              |
| GSMUA_Achr5T26970_001             | #N/A      | 8.0683636 | #N/A      | Respiratory burst oxidase homolog protein B           |
| GSMUA_AchrUn_randomT28<br>250_001 | #N/A      | 7.1334032 | 8.4150617 | Cytochrome P450 71A1                                  |
| GSMUA_Achr4T18430_001             | #N/A      | 6.9403136 | #N/A      | Abscisic acid 8'-hydroxylase 1                        |
| GSMUA_Achr11T09430_001            | #N/A      | 6.910651  | #N/A      | Probable NAD(P)H-dependent oxidoreductase 1           |
| GSMUA_Achr11T23780_001            | #N/A      | 6.1878576 | 5.9779668 | Ferritin-3, chloroplastic                             |
| GSMUA_Achr6T21530_001             | #N/A      | 6.1187807 | #N/A      | Peroxidase 52                                         |
| GSMUA_Achr10T27850_001            | #N/A      | 5.7362091 | #N/A      | Peroxidase 52                                         |
| GSMUA_Achr2T08400_001             | #N/A      | 5.3308747 | #N/A      | Putative 2-aminoethanethiol dioxygenase               |
| GSMUA_Achr8T32640_001             | #N/A      | 5.2396533 | #N/A      | Acyl-[acyl-carrier-protein] desaturase, chloroplastic |
| GSMUA_Achr6T27140_001             | #N/A      | 4.4052597 | #N/A      | siroheme synthase, putative                           |
| GSMUA_Achr4T08230_001             | #N/A      | 4.1392846 | 4.7708565 | Inositol oxygenase 1                                  |
| GSMUA_Achr10T18280_001            | #N/A      | 4.0475892 | #N/A      | UDP-glucose 6-dehydrogenase                           |
| GSMUA_Achr7T10870_001             | #N/A      | 3.4377689 | #N/A      | chlorophyll(ide) b reductase NYC1                     |
| GSMUA_Achr7T26580_001             | #N/A      | 3.3392906 | #N/A      | UDP-glucose 6-dehydrogenase                           |
| GSMUA_Achr4T02230_001             | #N/A      | 3.3232868 | #N/A      | Putative Apoptosis-inducing factor homolog B          |
| GSMUA_Achr6T33120_001             | #N/A      | -3.195639 | -4.337421 | L-ascorbate peroxidase, cytosolic                     |

|                                |           |           |           |                                                                                 |
|--------------------------------|-----------|-----------|-----------|---------------------------------------------------------------------------------|
| GSMUA_Achr8T13460_001          | 11.961653 | #N/A      | #N/A      | Ferredoxin--NADP reductase, leaf isozyme                                        |
| GSMUA_Achr4T07780_001          | 11.889718 | #N/A      | #N/A      | Quinone oxidoreductase-like protein                                             |
| GSMUA_Achr7T24700_001          | 11.718745 | 10.018997 | 11.572278 | Putative Uncharacterized hydroxylase C887.15c                                   |
| GSMUA_Achr8T11670_001          | 11.612357 | #N/A      | #N/A      | NAD(P)H-quinone oxidoreductase subunit M                                        |
| GSMUA_Achr7T11330_001          | 11.059776 | #N/A      | #N/A      | Peroxidase 15                                                                   |
| GSMUA_Achr4T31780_001          | 10.572519 | #N/A      | #N/A      | Uncharacterized oxidoreductase                                                  |
| GSMUA_Achr3T17110_001          | 10.235707 | #N/A      | #N/A      | Putative Estradiol 17-beta-dehydrogenase 12                                     |
| GSMUA_Achr9T13520_001          | 10.167764 | 8.9080272 | #N/A      | Protein WAX2                                                                    |
| GSMUA_Achr11T24060_001         | 10.089986 | 10.264349 | #N/A      | Tropinone reductase homolog                                                     |
| GSMUA_Achr11T01430_001         | 7.9841659 | #N/A      | #N/A      | Ferredoxin--NADP reductase, leaf isozyme, chloroplastic                         |
| GSMUA_Achr11T22300_001         | 7.8215417 | #N/A      | #N/A      | Glyceraldehyde-3-phosphate dehydrogenase B                                      |
| GSMUA_Achr11T01900_001         | 7.0650247 | #N/A      | #N/A      | Protochlorophyllide reductase B,                                                |
| GSMUA_Achr7T07880_001          | 6.6074744 | 4.3293196 | #N/A      | Probable peroxisomal (S)-2-hydroxy-acid oxidase 2                               |
| GSMUA_Achr9T29540_001          | 6.3137197 | #N/A      | #N/A      | Putative Peroxidase 12                                                          |
| GSMUA_Achr3T11750_001          | 6.2037078 | 9.1036267 | 10.2955   | Putative 3-oxoacyl-[acyl-carrier-protein] reductase                             |
| GSMUA_Achr8T11740_001          | 6.1151529 | 7.4362729 | 6.9971128 | Aldehyde dehydrogenase family 3 member F1                                       |
| GSMUA_Achr6T00040_001          | 6.00509   | #N/A      | #N/A      | Cytochrome P450 85A1                                                            |
| GSMUA_Achr5T20330_001          | 4.9459265 | 4.6176329 | #N/A      | Peroxidase 5                                                                    |
| GSMUA_Achr8T12220_001          | 4.8864591 | 6.5639038 | #N/A      | fatty acid hydroxylase, putative,                                               |
| GSMUA_Achr3T25050_001          | 4.6789856 | #N/A      | #N/A      | Magnesium-protoporphyrin IX monomethyl ester [oxidative] cyclase, chloroplastic |
| GSMUA_Achr10T00370_001         | 4.2126663 | #N/A      | #N/A      | Magnesium-protoporphyrin IX monomethyl ester [oxidative] cyclase                |
| GSMUA_Achr4T14320_001          | 4.1942108 | 5.0695261 | #N/A      | UDP-glucose 6-dehydrogenase                                                     |
| GSMUA_Achr2T13890_001          | 3.6586487 | #N/A      | 4.5179883 | 5'-adenylylsulfate reductase 3                                                  |
| GSMUA_Achr6T14620_001          | 3.5061891 | 5.4906648 | #N/A      | Putative Peroxidase 52                                                          |
| GSMUA_Achr10T12920_001         | 3.4141129 | 5.1445819 | 4.7591894 | Trans-cinnamate 4-monoxygenase                                                  |
| <b>Cell wall related genes</b> |           |           |           |                                                                                 |
| GSMUA_Achr5T17150_001          | #N/A      | #N/A      | 7.501847  | Hypothetical protein                                                            |
| GSMUA_Achr7T15620_001          | #N/A      | 8.0811427 | 7.5249613 | Pectinesterase/pectinesterase inhibitor PPE8B                                   |
| GSMUA_Achr7T11480_001          | #N/A      | 3.7920904 | #N/A      | Pectinesterase 3                                                                |
| GSMUA_Achr11T22960_001         | #N/A      | 14.593784 | 17.486186 | Expansin-A8                                                                     |
| GSMUA_Achr5T07470_001          | #N/A      | 10.714791 | 11.668475 | Expansin-A2                                                                     |
| GSMUA_Achr5T07480_001          | #N/A      | 12.899815 | 12.492532 | Expansin-A2                                                                     |
| GSMUA_Achr6T10730_001          | #N/A      | 6.1668    | #N/A      | Expansin-A15                                                                    |
| GSMUA_Achr11T05430_001         | #N/A      | -5.706748 | -5.044671 | Pectinesterase 3                                                                |
| GSMUA_Achr1T23250_001          | #N/A      | #N/A      | #N/A      | Hevein-like protein                                                             |
| GSMUA_Achr6T21330_001          | #N/A      | #N/A      | #N/A      | Endochitinase PR4                                                               |
| GSMUA_Achr5T17150_001          | #N/A      | #N/A      | 7.501847  | Hypothetical protein                                                            |
| GSMUA_Achr7T15620_001          | #N/A      | 8.0811427 | 7.5249613 | Pectinesterase/pectinesterase inhibitor PPE8B                                   |
| GSMUA_Achr7T11480_001          | #N/A      | 3.7920904 | #N/A      | Pectinesterase 3                                                                |
| GSMUA_Achr11T22960_001         | #N/A      | 14.593784 | 17.486186 | Expansin-A8                                                                     |
| GSMUA_Achr5T07470_001          | #N/A      | 10.714791 | 11.668475 | Expansin-A2                                                                     |
| GSMUA_Achr5T07480_001          | #N/A      | 12.899815 | 12.492532 | Expansin-A2                                                                     |
| GSMUA_Achr6T10730_001          | #N/A      | 6.1668    | #N/A      | Expansin-A15                                                                    |
| GSMUA_Achr11T05430_001         | #N/A      | -5.706748 | -5.044671 | Pectinesterase 3                                                                |
| GSMUA_AchrUn_randomT04250_001  | #N/A      | 8.9612034 | 9.1558624 | Probable pectate lyase 15                                                       |
| GSMUA_Achr6T28260_001          | #N/A      | 9.4929317 | 9.5099626 | Probable pectate lyase 22                                                       |
| GSMUA_Achr4T26690_001          | #N/A      | 7.0687309 | #N/A      | Probable pectate lyase 15                                                       |
| <b>Heat shock protein</b>      |           |           |           |                                                                                 |
| GSMUA_Achr10T21120_001         | -3.368716 | -4.647048 | #N/A      | 17.2 kDa class II heat shock protein                                            |
| GSMUA_Achr4T11940_001          | #N/A      | 3.3381916 | #N/A      | Luminal-binding protein 4                                                       |
| GSMUA_Achr8T23700_001          | #N/A      | 4.4147024 | #N/A      | heat shock protein DnaJ, putative, expressed                                    |
| GSMUA_AchrUn_randomT07470_001  | #N/A      | -3.700634 | #N/A      | heat shock protein DnaJ, putative, expressed                                    |
| GSMUA_Achr7T05830_001          | #N/A      | 7.5741686 | 9.6485957 | Oligopeptide transporter 7                                                      |
| GSMUA_Achr3T31860_001          | #N/A      | #N/A      | 12.951674 | heat shock transcription factor                                                 |
| <b>aquaporin</b>               |           |           |           |                                                                                 |
| GSMUA_Achr11T00590_001         | 3.0154888 | #N/A      | #N/A      | Aquaporin PIP2-3                                                                |
| GSMUA_Achr9T28940_001          | #N/A      | -4.190714 | #N/A      | Probable aquaporin TIP2-2                                                       |
| GSMUA_Achr4T20780_001          | 2.996134  | 3.9810613 | #N/A      | Aquaporin PIP2-4                                                                |
| GSMUA_Achr8T12920_001          | #N/A      | -4.358404 | #N/A      | Probable aquaporin TIP1-1                                                       |
| GSMUA_Achr6T05830_001          | #N/A      | -3.395407 | #N/A      | Probable aquaporin TIP2-2                                                       |
| GSMUA_Achr11T02240_001         | 3.8748548 | #N/A      | #N/A      | Probable aquaporin TIP1-1                                                       |
| GSMUA_AchrUn_randomT06140_001  | 5.6947865 | #N/A      | 5.65202   | Probable aquaporin PIP1-2                                                       |

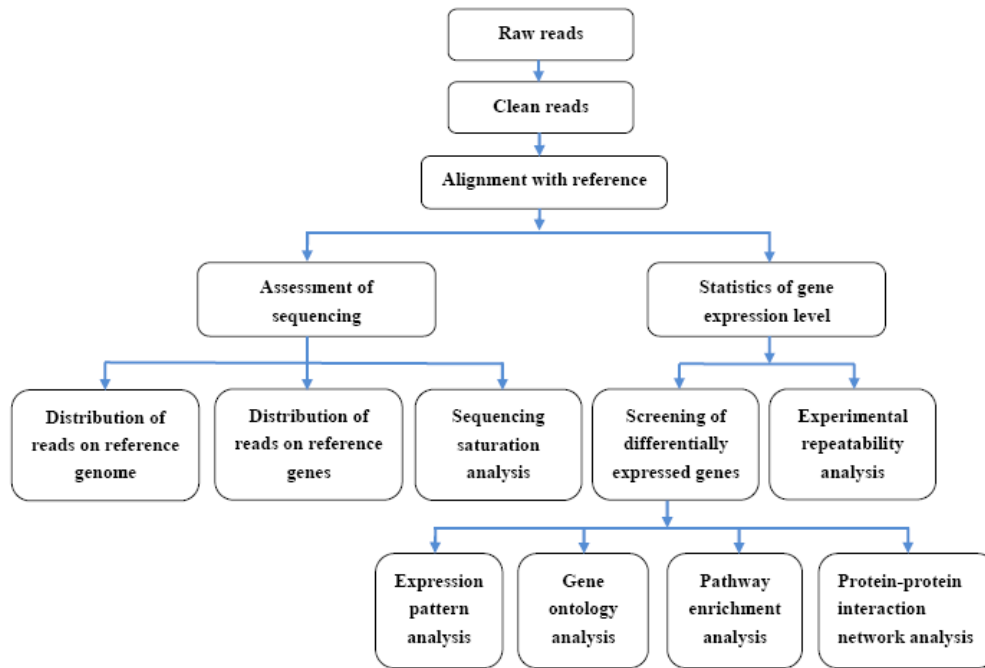

**Figure S1.** The pipeline of all the analysis done in this study.

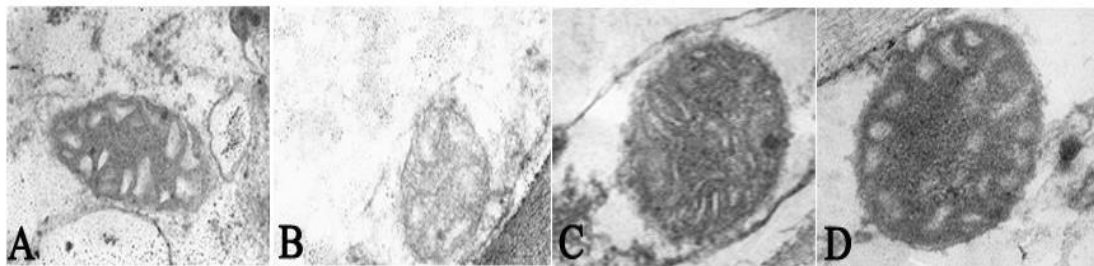

**Figure S2.** The ultrastructure of mitochondria of banana flesh cell in different ripening stages. A: F1; B: F2; C: F3; D: F4.

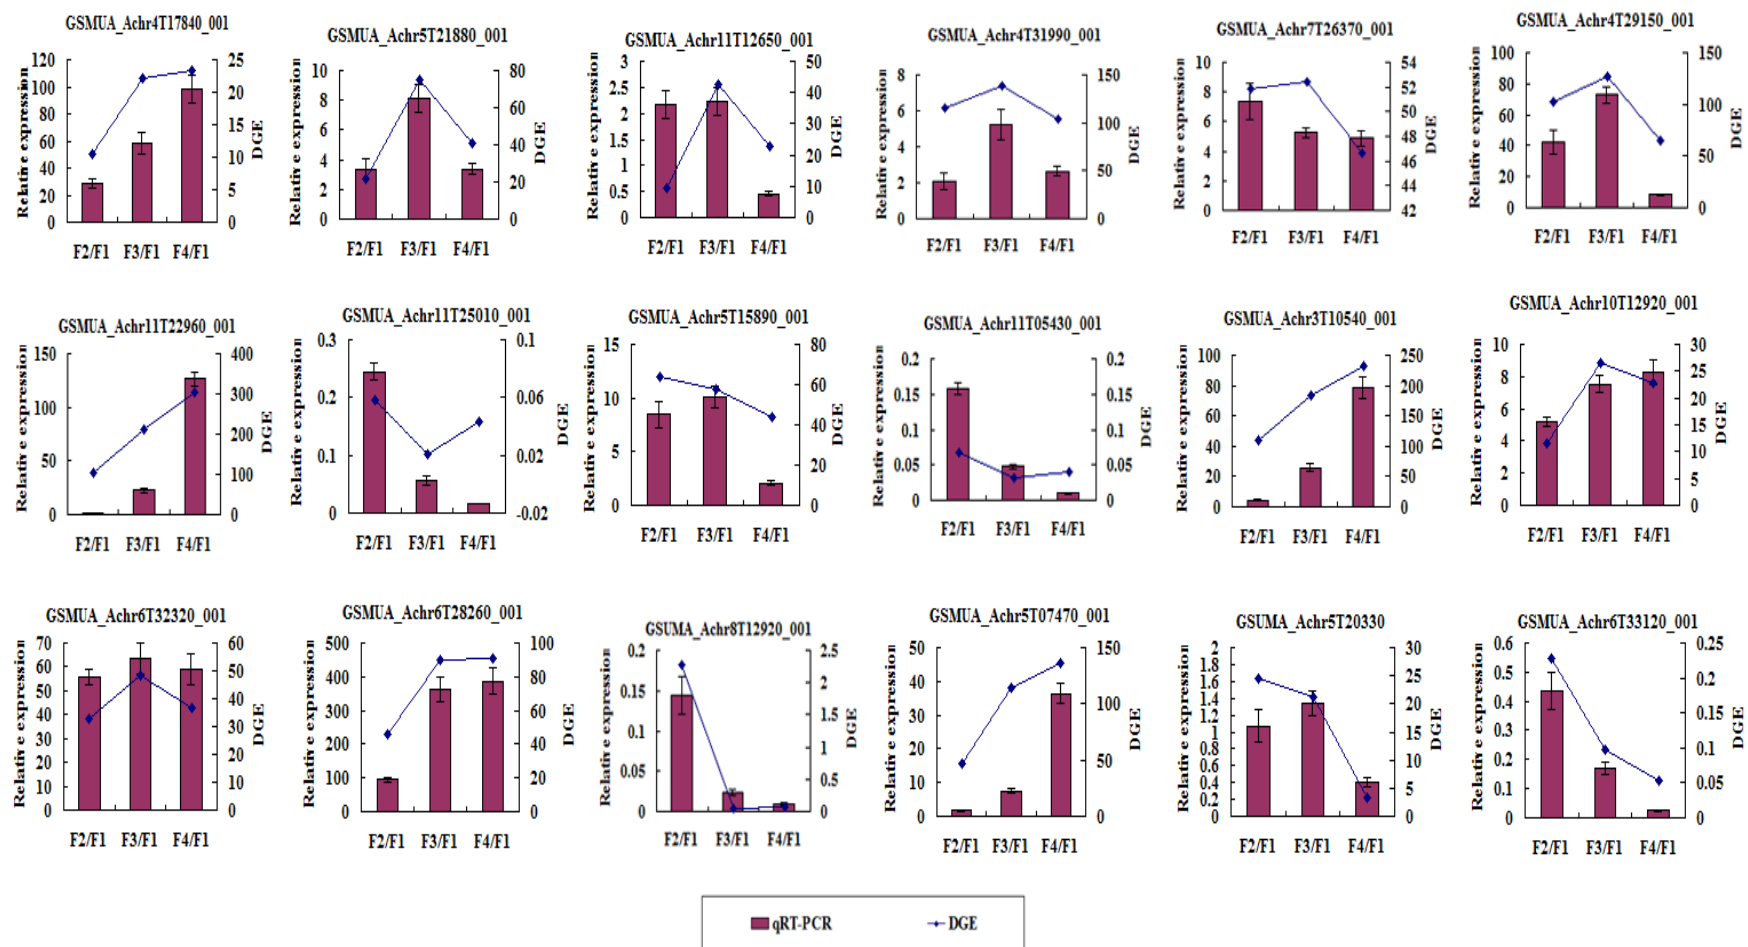

Figure S3. Validation of the RNA-Seq expression data using quantitative real-time PCR.



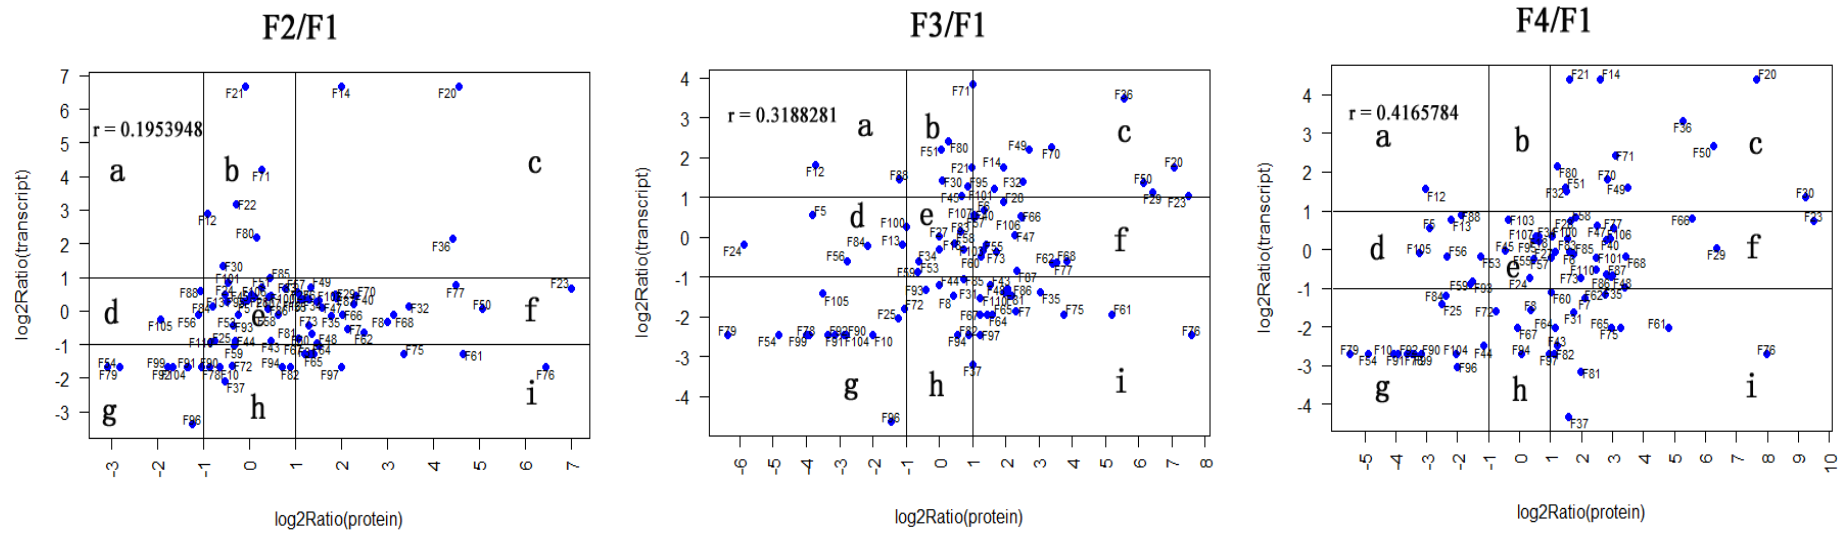

**Figure S4.** Correlation between the differentially expressed proteins and genes in the whole library. The x-axis shows the expression quantity of the differentially expressed proteins and the y-axis shows the expression quantity of genes in the whole library.

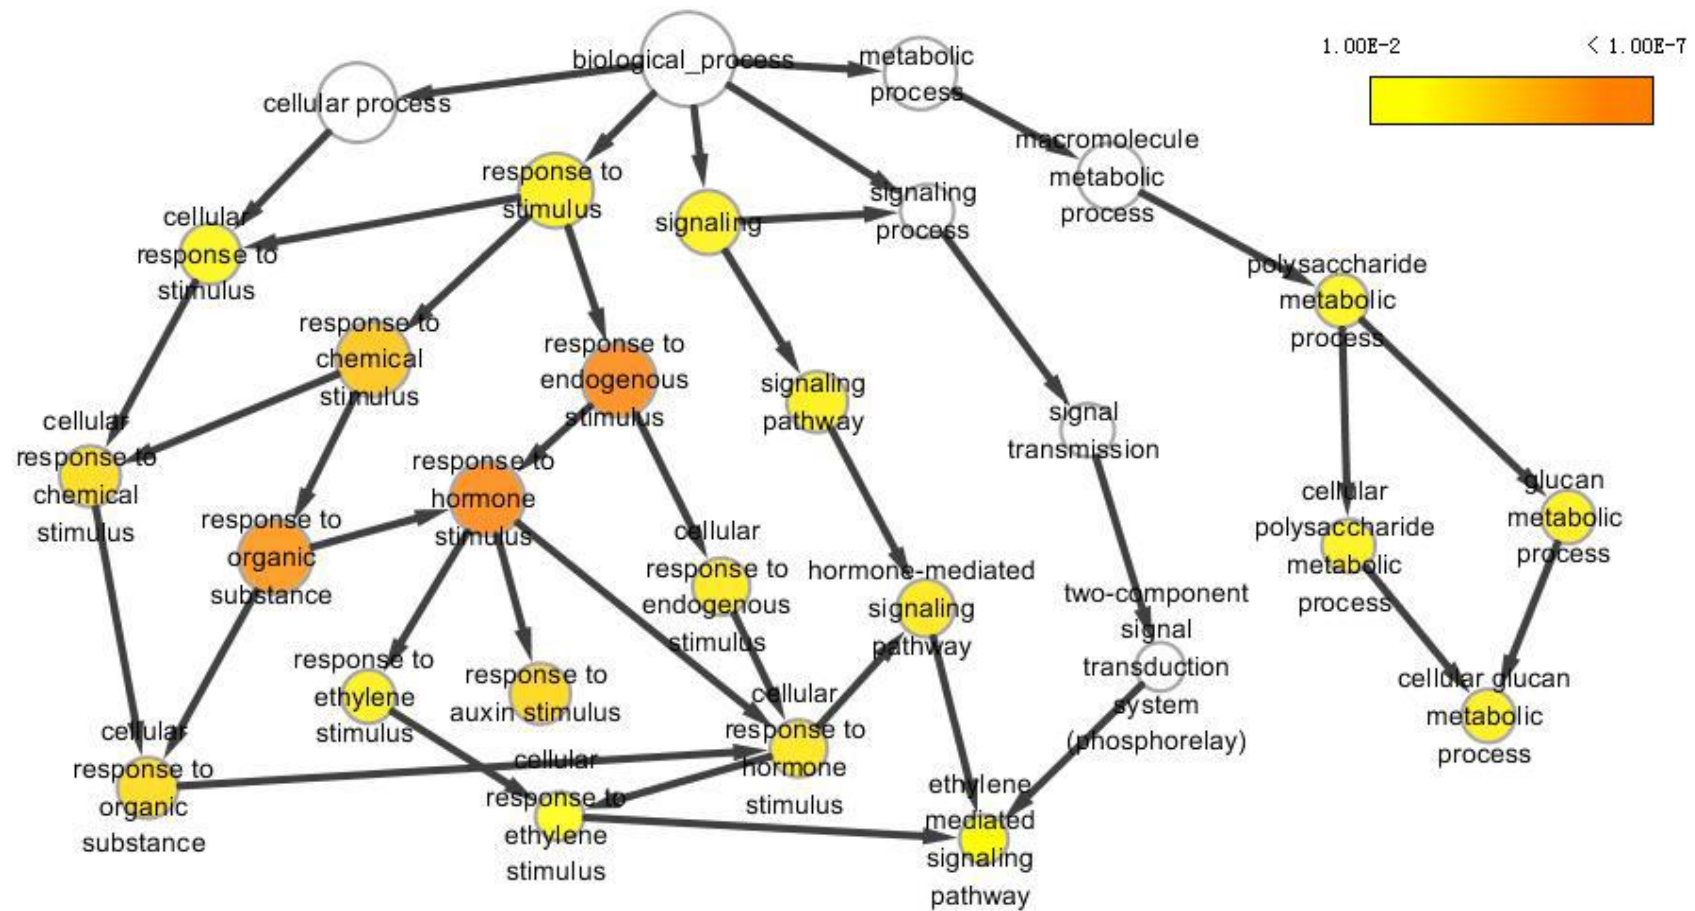

Figure S5. Clustering of signal transduction related genes using BiNGO 2.44.

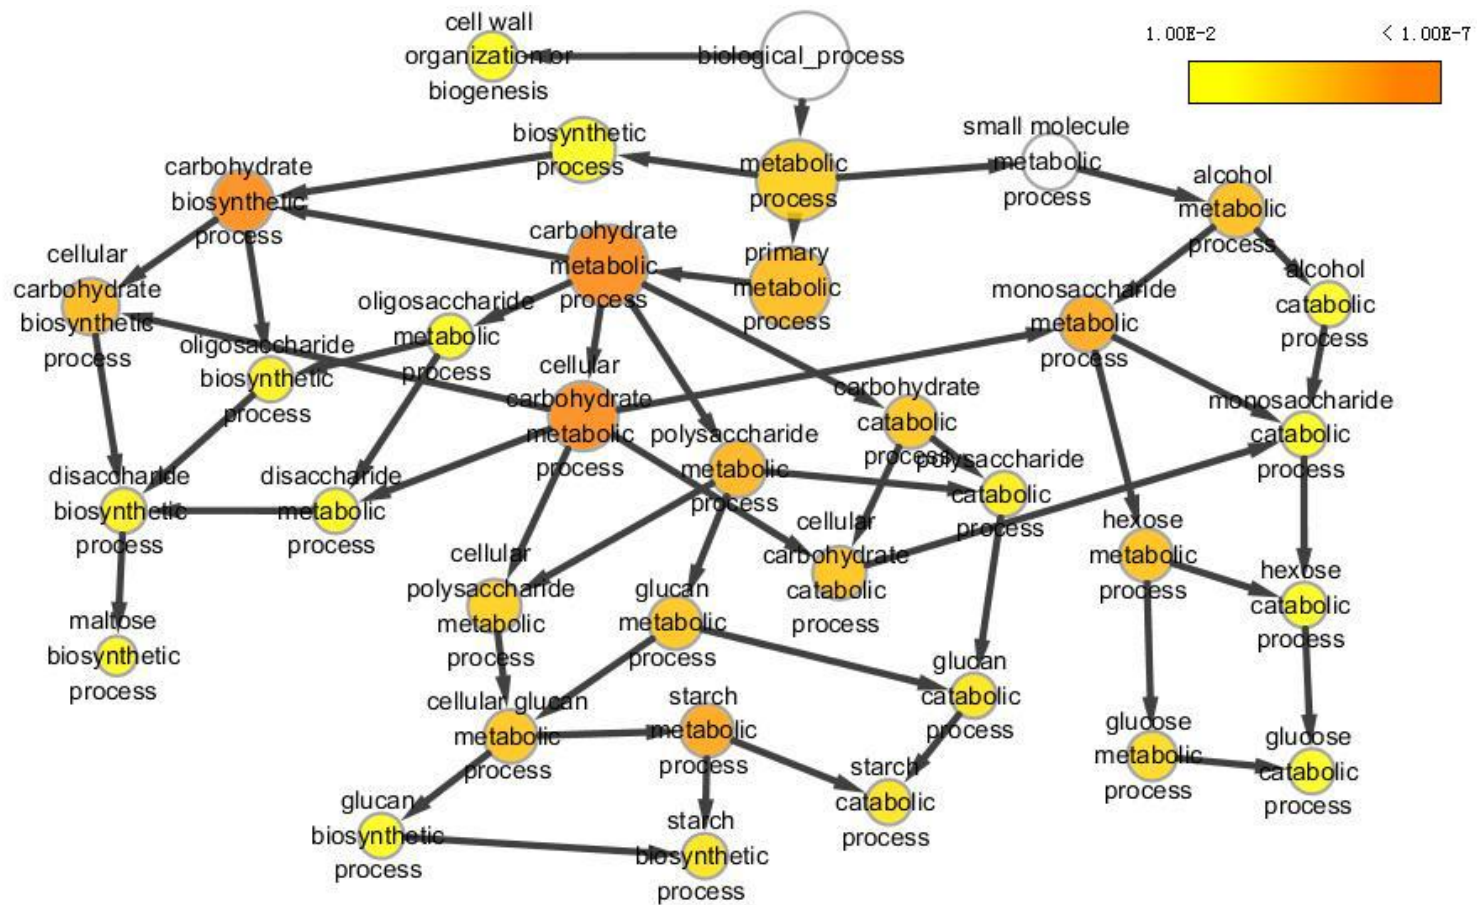

**Figure S6.** Clustering of sugar metabolism related genes using BiNGO 2.44.

**A**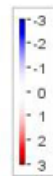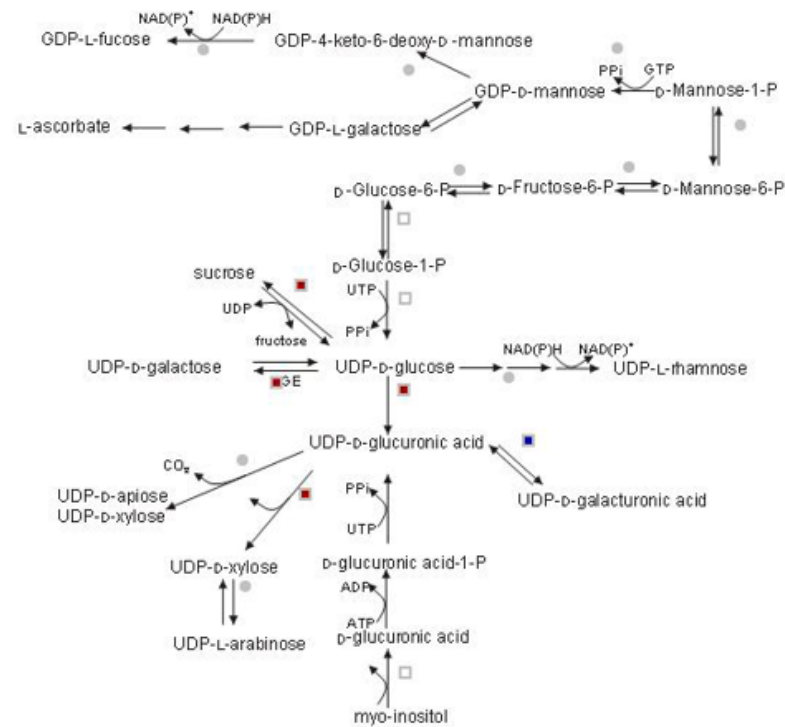**B**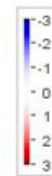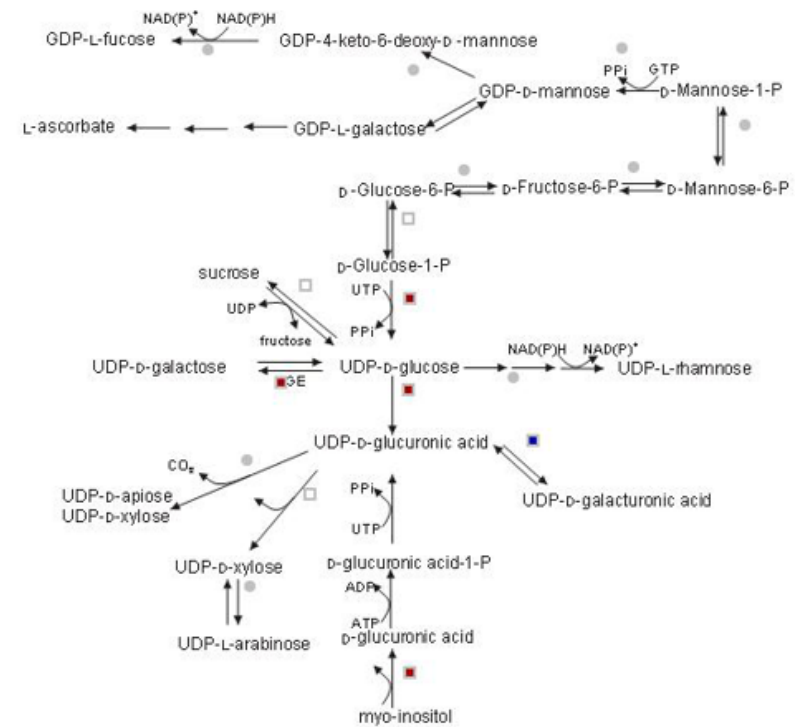

Figure S7. Cont.

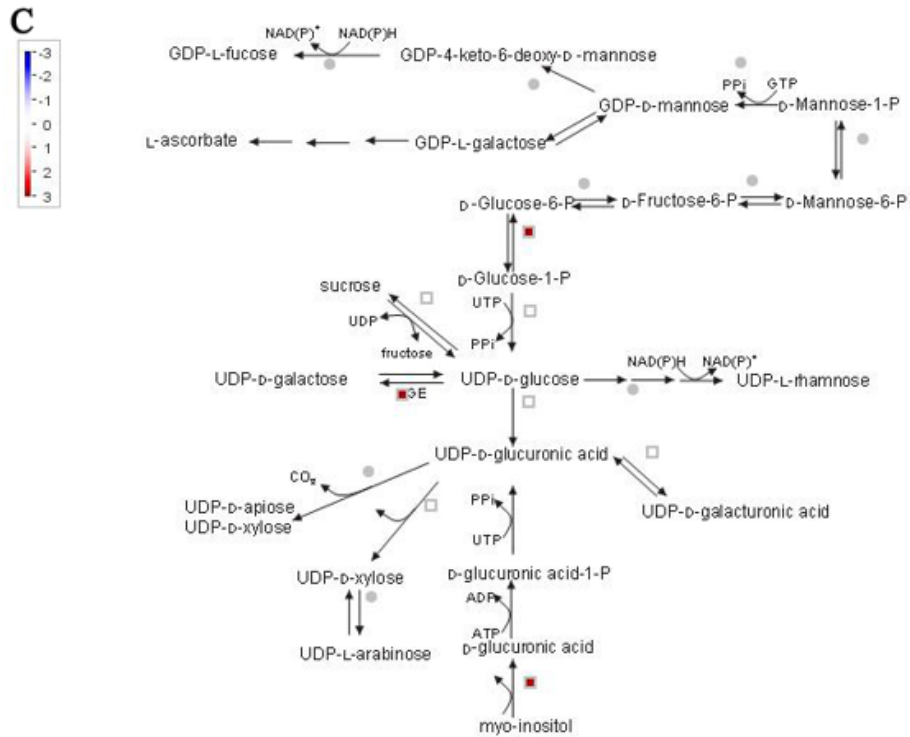

**Figure S7.** Schematic of the cell wall metabolism pathway using the MapMan visualization platform. The red or blue squares indicate the up- or down-regulated genes involved in the second metabolic pathways. **A:** F2/F1; **B:** F3/F1; **C:** F4/F1.

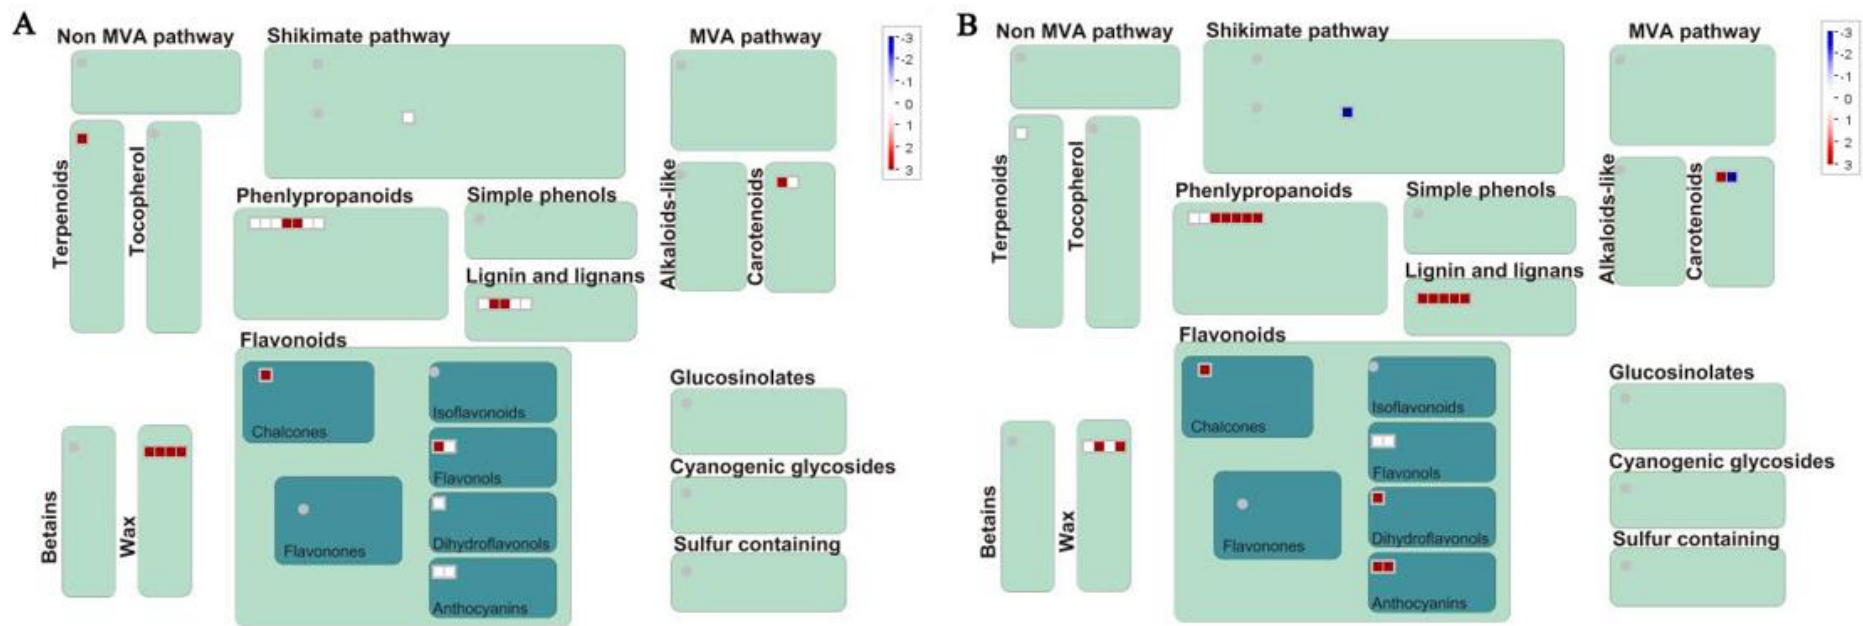

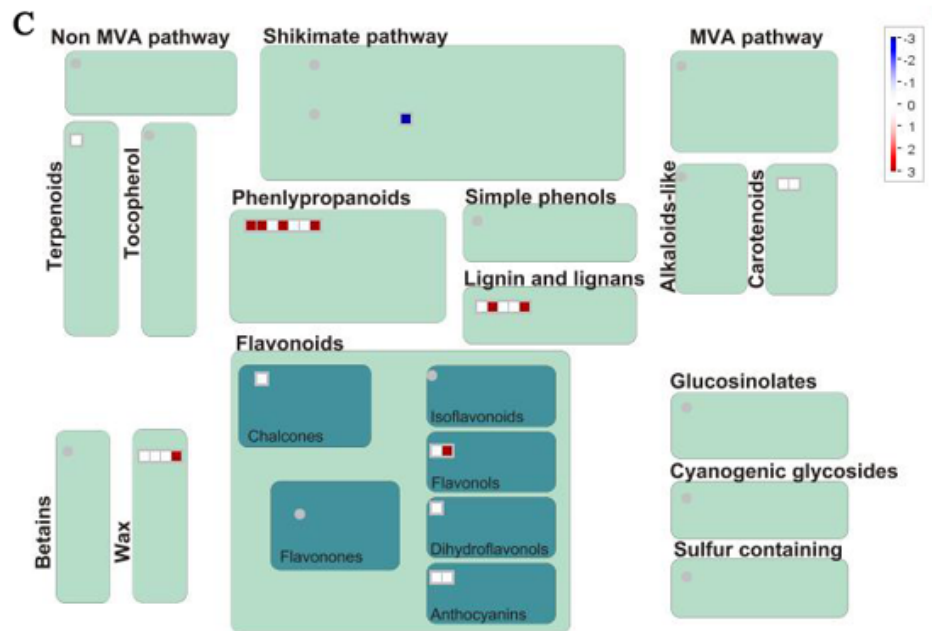

**Figure S8.** Schematic of the secondary metabolism pathway using the MapMan visualization platform. The red or blue squares indicate the up- or down-regulated genes involved in the second metabolic pathways. **A:** F2/F1; **B:** F3/F1; **C:** F4/F1.
